# Supplementary material
Source: PubMed Central journal article supplement (PMC7537517)
Supplement: ASE-13-671-s001.pdf [file ASE-13-671-s001.pdf]

**Impact of COVID-19 on the anatomy teaching and on the pre-clinical medical students -  
A personal experience – Questionnaire**

**Q1. Tick the appropriate:**

- Female
- Male

**Q2. Tick the appropriate:**

- 1<sup>st</sup> year medical student
- 2<sup>nd</sup> year medical student

**Q3. Tick the appropriate:**

- 18 – 20 years
- 21 – 23 years
- >24 years

**Q4. During the COVID-19 pandemic, where are you living?**

- At home with your family
- Alone
- With friends

**Q5. Are you concerned about your medical education due to the COVID-19 pandemic?**

- Yes
- No
- Not sure

**Q6. How satisfied are you with the online teaching adopted due to COVID-19 measures?**

- Very satisfied
- Satisfied
- Neither satisfied nor dissatisfied
- Dissatisfied
- Very dissatisfied

**Q7. Which mode of online teaching do you prefer?**

- Only notes on VLE
- Zoom™ online lectures
- Panopto™ pre-recorded lectures
- Other method/s, specify: \_\_\_\_\_

**Q8. Do you feel you achieved your desired anatomy learning outcome/s through the online teaching?**

- Yes
- No
- Not sure

**Q9. Do you feel that online anatomy teaching is a better way of learning than the normal classroom teaching?**

- Yes
- No
- Not sure

**Q10. Has this shift to online teaching affected the way you study?**

- Yes
- No
- Not sure

**Q11. Do you feel that this way of teaching (online) has affected your personal wellbeing?**

- Yes
- No
- Not sure

**Q12. Over the last 2 weeks, how often have you been bothered by any of the following problems? Tick the most appropriate.**

|                                                   | <b>Not at all<br/>(0)</b> | <b>Several<br/>days (1)</b> | <b>More than half<br/>the days (2)</b> | <b>Nearly<br/>every<br/>day (3)</b> |
|---------------------------------------------------|---------------------------|-----------------------------|----------------------------------------|-------------------------------------|
| Feeling nervous, anxious, or on edge              |                           |                             |                                        |                                     |
| Not being able to stop or control worrying        |                           |                             |                                        |                                     |
| Worrying too much about different things          |                           |                             |                                        |                                     |
| Trouble relaxing                                  |                           |                             |                                        |                                     |
| Being so restless that it's hard to sit still     |                           |                             |                                        |                                     |
| Becoming easily annoyed or irritable              |                           |                             |                                        |                                     |
| Feeling afraid as if something awful might happen |                           |                             |                                        |                                     |

**Q. 13 Which of the following were you worrying about? Tick the most appropriate**

|                                                                            | <b>Not at all<br/>(1)</b> | <b>Slightly<br/>(2)</b> | <b>A moderate<br/>amount (3)</b> | <b>A great<br/>deal (4)</b> |
|----------------------------------------------------------------------------|---------------------------|-------------------------|----------------------------------|-----------------------------|
| Your physical health, safety or wellbeing                                  |                           |                         |                                  |                             |
| The physical health, safety or wellbeing of your loved ones                |                           |                         |                                  |                             |
| Your own mental and emotional wellbeing                                    |                           |                         |                                  |                             |
| The impact of COVID-19 on your lectures / tutorials / dissections sessions |                           |                         |                                  |                             |
| The impact of COVID-19 on your studies                                     |                           |                         |                                  |                             |
| The impact of COVID-19 on your learning outcomes                           |                           |                         |                                  |                             |
| The impact of COVID-19 on your exams                                       |                           |                         |                                  |                             |

|                                                                                      |  |  |  |  |
|--------------------------------------------------------------------------------------|--|--|--|--|
| The impact of COVID-19 on your progression to 2 <sup>nd</sup> / 3 <sup>rd</sup> year |  |  |  |  |
| The impact of COVID-19 on the Faculty and University                                 |  |  |  |  |
| The impact of COVID-19 on Malta as a nation                                          |  |  |  |  |
